# Supplementary material
Source: PubMed Central journal article supplement (PMC5727854)
Supplement: ba007591-suppl1.pdf [file ba007591-suppl1.pdf]

# Supplemental Data

**Paradoxical enhancement of leukemogenesis in acute myeloid leukemia  
with moderately-attenuated RUNX1 expressions.**

Supplemental Tables p. 2

Supplemental Figures p. 7

# Supplemental Tables

| PCR primers used for RT-qPCR                                      | Forward (5' → 3')        | Reverse (5' → 3')        |
|-------------------------------------------------------------------|--------------------------|--------------------------|
| <i>RUNX1</i>                                                      | CTGCTCCGTGCTGCCTAC       | AGCCATCACAGTGACCAGAGT    |
| <i>RUNX2</i>                                                      | GGTTAATCTCCGCAGGTCACT    | CACTGTGCTGAAGAGGCTGTT    |
| <i>RUNX3</i>                                                      | CAGAAGCTGGAGGACCAGAC     | GTCGGAGAATGGGTTTCAGTT    |
| <i>GSTA2</i>                                                      | ATGTTCCAGCAAGTGCCAATG    | TGAGAATGGCTCTGGTCTGCA    |
| <i>GAPDH</i>                                                      | CATGTTTCGTCATGGGGTGAACCA | AGTGATGGCATGGACTGTGGTCAT |
| Pan <i>RUNX</i><br>( <i>RUNX1</i> + <i>RUNX2</i> + <i>RUNX3</i> ) | GCACCGACAGCCCCAACTT      | GTCTTGTTCAGCGCCAGTG      |

**Table S1**

List of primers used for RT-qPCR experiments in this study.

| PCR primers used for ChIP | Forward (5' → 3')          | Reverse (5' → 3')            |
|---------------------------|----------------------------|------------------------------|
| <i>GSTA2 P1</i>           | ATGCCTATGACCAGATTTAGTTAAAA | GCAGAATGTCAGAAGTAAATTTCTATAC |
| <i>GSTA2 P2</i>           | GCGTGTTTGGATTAGAAGTGATT    | TCTGGTATATCTGGATAGGCC        |

**Table S2**

List of primers used for ChIP assay in this study.

| Target sequences for shRNA knockdown experiments. | 5' → 3'              |
|---------------------------------------------------|----------------------|
| sh_ <i>RUNX1</i> <i>profound</i> #1               | AGCTTCACTCTGACCATCA  |
| sh_ <i>RUNX1</i> <i>profound</i> #2               | AACCTCGAAGACATCGGCA  |
| sh_ <i>RUNX1</i> <i>moderate</i> #1               | ATGCTACCGCAGCCATGAA  |
| sh_ <i>RUNX1</i> <i>moderate</i> #2               | ACTTTCCAGTCGACTCTCA  |
| sh_ <i>Luc.</i>                                   | CGTACGCGGAATACTTCGA  |
| sh_ <i>GSTA2</i> #1                               | AGGAGAAAGCCCTGATTGAT |
| sh_ <i>GSTA2</i> #2                               | AGGAACAAGATGCCAAGCT  |

**Table S3**

List of target sequences for shRNA-mediated knockdown experiments in this study.

| RUNX1 expression                                | High       | Medium     | Low        |
|-------------------------------------------------|------------|------------|------------|
| <b>Total number of patients included</b>        | 62         | 63         | 62         |
| <b>Sex</b>                                      |            |            |            |
| Female                                          | 34         | 29         | 23         |
| Male                                            | 28         | 34         | 39         |
| <b>Age at diagnosis</b><br>(average, years old) | 58.2 ± 1.9 | 55.4 ± 1.8 | 52.3 ± 2.3 |
| <b>Cytogenetic risk category</b>                |            |            |            |
| Favorable                                       | 9          | 15         | 11         |
| Intermediate                                    | 34         | 35         | 41         |
| Poor                                            | 18         | 11         | 9          |
| Not available                                   | 1          | 1          | 1          |

#### **Table S4**

Clinical background of AML patients from TCGA clinical datasets (n = 187). Patients were divided into 3 groups according to their *RUNX1* expressions (*RUNX1* high; n = 62, *RUNX1* intermediate; n = 63, *RUNX1* low; n = 62). Cytogenetic risk is determined according to the WHO classification guidelines.

# Supplemental Figures

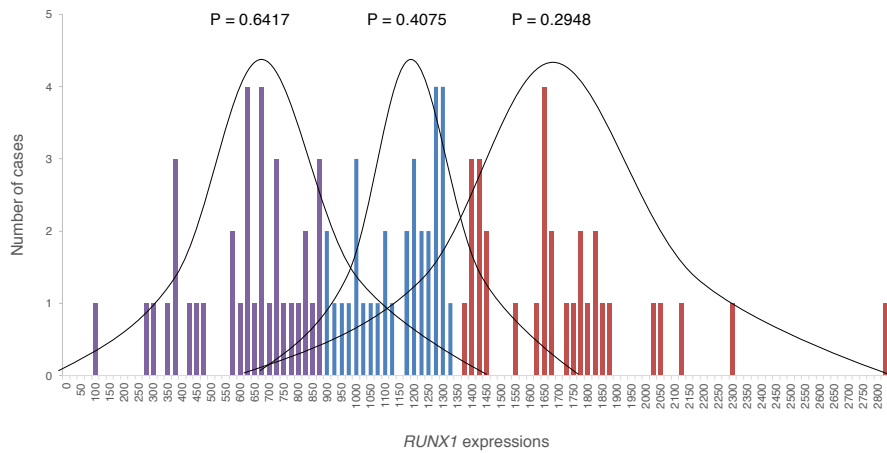

**Figure S1**

Histogram showing the distribution of *RUNX1* expressions in AML patients from TCGA clinical datasets ( $n = 187$ ). Patients were divided into 3 groups according to their *RUNX1* expressions (*RUNX1* high;  $n = 62$ , *RUNX1* intermediate;  $n = 63$ , *RUNX1* low;  $n = 62$ ). Kolmogorov-Smirnov test was used to examine whether each peak follows normal (Gaussian) distribution.  $P < 0.05$  was considered statistically significant.



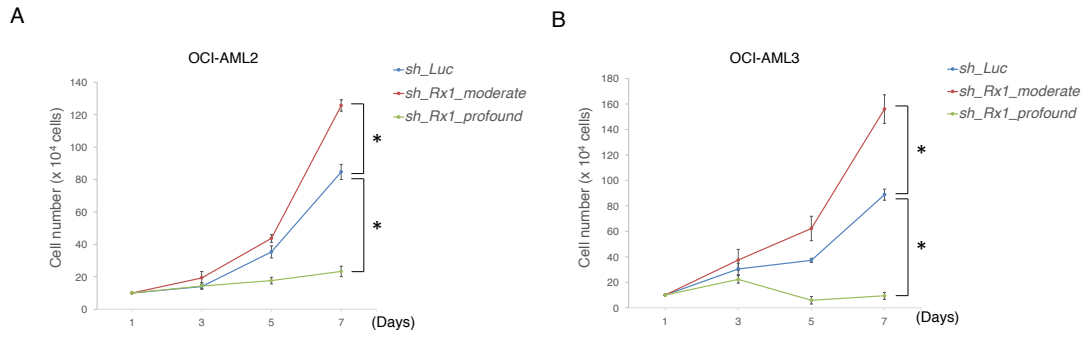

**Figure S2**

(A and B) Growth curves of OCI-AML2 (A) and OCI-AML3 (B). Cells were transduced with control (*sh\_Luc.*) or with RUNX1 shRNAs (*sh\_Rx1\_moderate* #1 or *sh\_Rx1\_profound* #1), then cultured in the presence of 3  $\mu$ M of doxycycline (n = 3). Data are mean $\pm$ SEM values. \* P < 0.05, by two-tailed Student's t test.

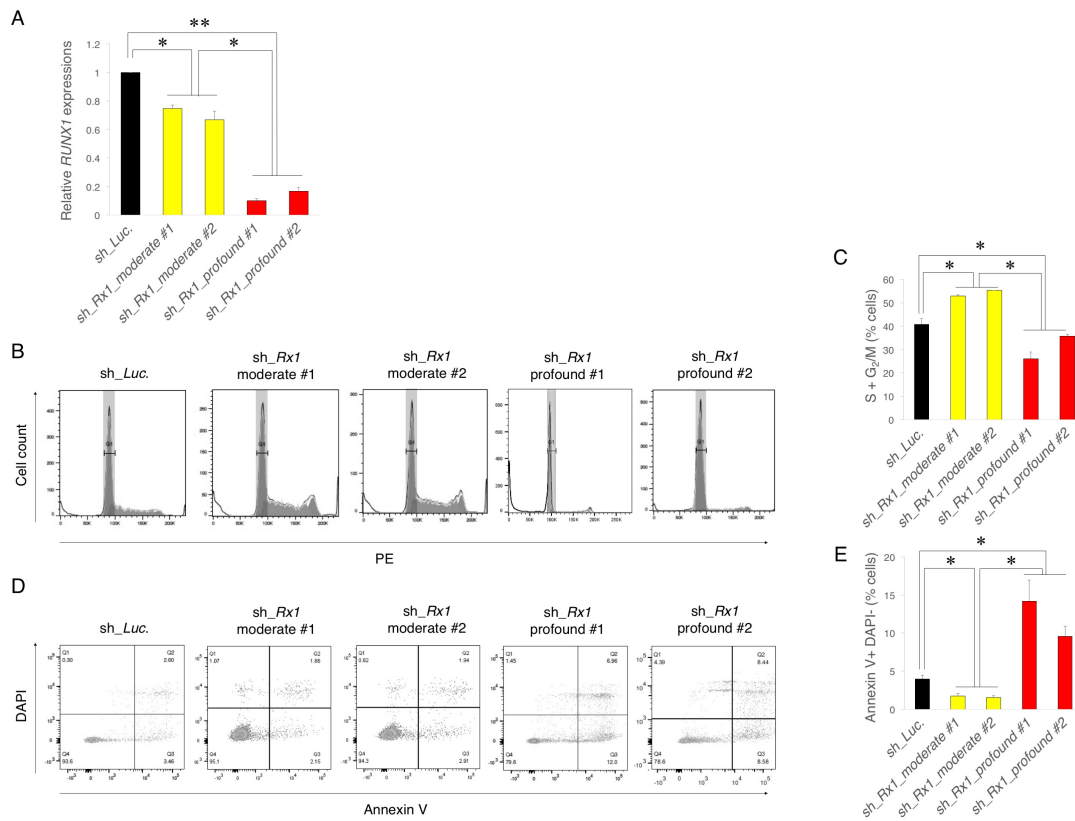

### Figure S3

(A) Efficacy of shRNAs targeting *RUNX1*. MV4-11 cells were transduced with lentivirus encoding shRNA targeting *Luciferase* (sh\_*Luc.*) or shRNAs against *RUNX1* (sh\_*Rx1*\_moderate #1, #2 or sh\_*Rx1*\_profound #1, #2) and incubated with 3 $\mu$ M doxycycline for 48 hours, then total RNA was prepared and analyzed by real-time RT-PCR. Values are normalized to that of control vector-transduced cells (n = 3).

(B and C) *RUNX1* depletion-mediated change in the cell cycle status was determined in MV4-11 cells used in (A). (B) Representative figures of cell cycle status. (C) Cumulative data of the number of cells with S + G<sub>2</sub>/M phase DNA content (n = 3).

(D and E) Frequency of early apoptotic cell death induced by *RUNX1* silencing. MV4-11 cells transduced with control (sh\_*Luc.*) or with *RUNX1* shRNAs (sh\_*Rx1*\_moderate #1, #2 or sh\_*Rx1*\_profound #1, #2) were treated as in (A), and the early apoptotic cells (Annexin V<sup>+</sup> DAPI) were scored by flow cytometric analysis. (D) Representative flow cytometry plots. (E) Cumulative data in (F) (n = 3).

Data are mean $\pm$ SEM values. \* P < 0.05, \*\* P < 0.01, by two-tailed Student's *t* test.

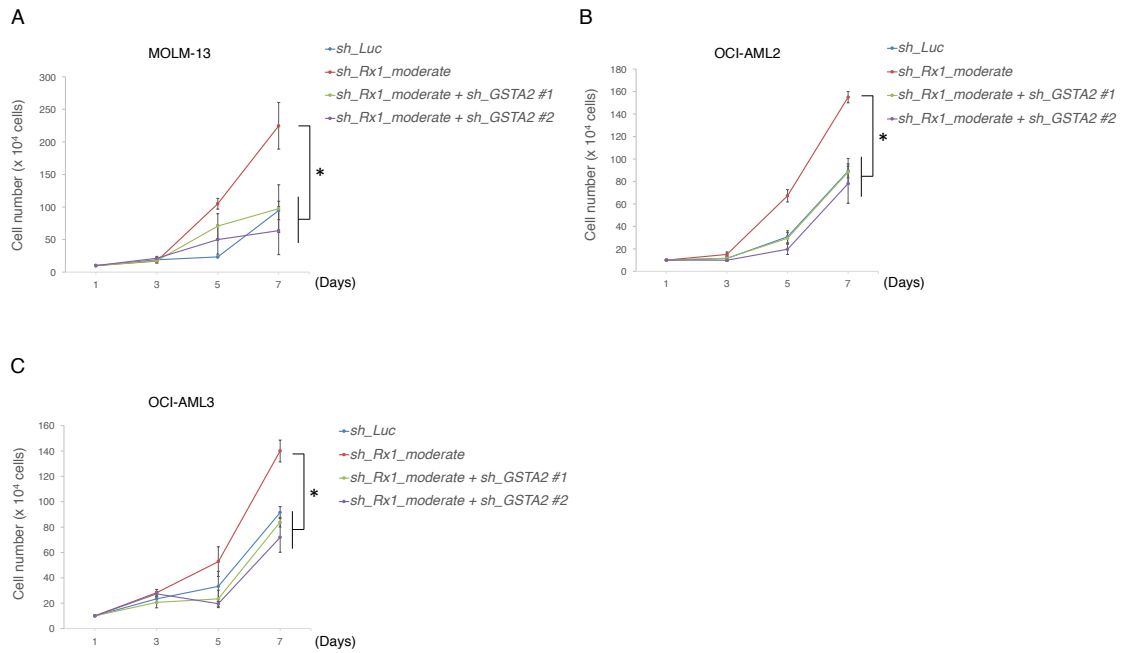

### Figure S4

(A-C) Growth curves of MOLM-13 (A), OCI-AML2 (B) and OCI-AML3 (C). Cells were transduced with lentivirus encoding shRNA targeting *Luciferase* (*sh\_Luc.*) or shRNAs against *GSTA2* (*sh\_GSTA2* #1 or *sh\_GSTA2* #2) with or without simultaneous transduction of shRNA targeting *RUNX1* (*sh\_Rx1\_moderate*), then cultured in the presence of 3  $\mu$ M doxycycline (n = 3).

Data are mean $\pm$ SEM values. \* P < 0.05, by two-tailed Student's t test.
